# Supplementary material for: A novel live-cell imaging system reveals a reversible hydrostatic pressure impact on cell-cycle progression
Source: Oxford University Press journal article supplement (doi:10.1242/jcs.212167), 2018-06-21
Supplement: jcs212167supp.pdf [file jcs212167supp.pdf]

A

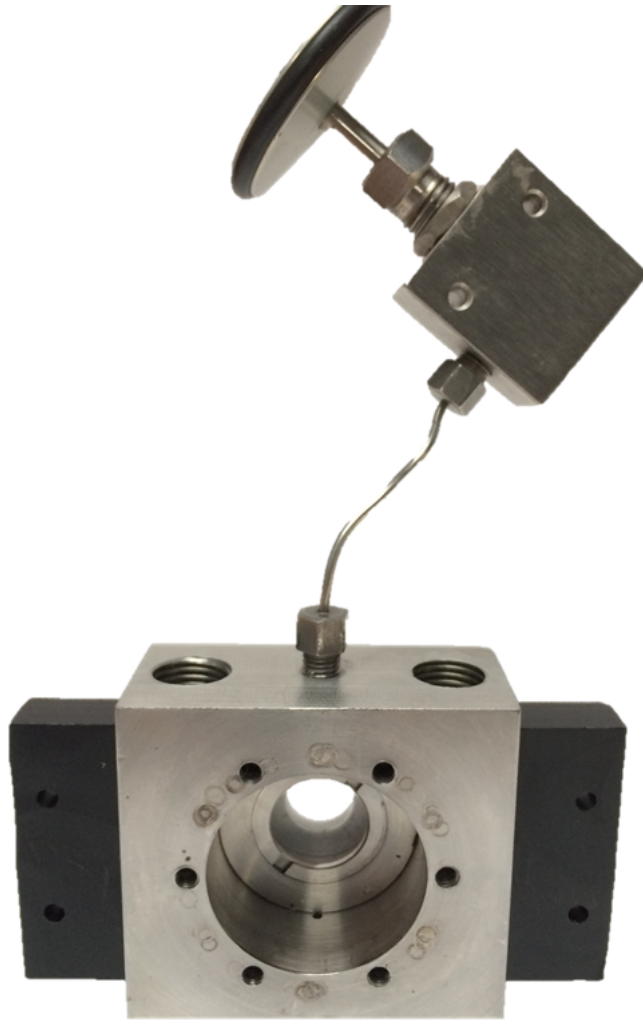

B

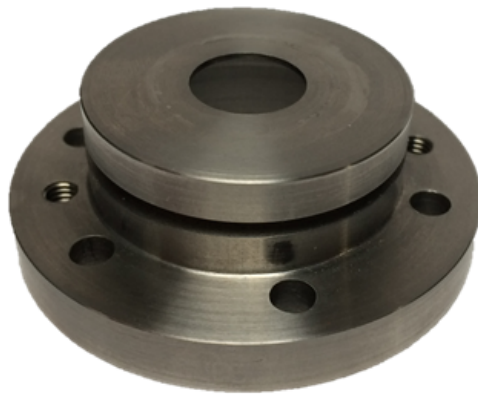

C

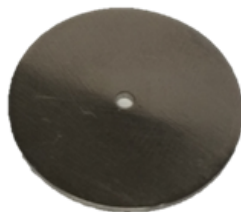

**Figure S1. Components of the high pressure live cell fluorescence microscopy chamber.** (A) Main chamber with upper transmission light window fitted and release valve attached. (B) Lower observation window and (C) polished steel disc onto which is mounted the quartz coverslip.

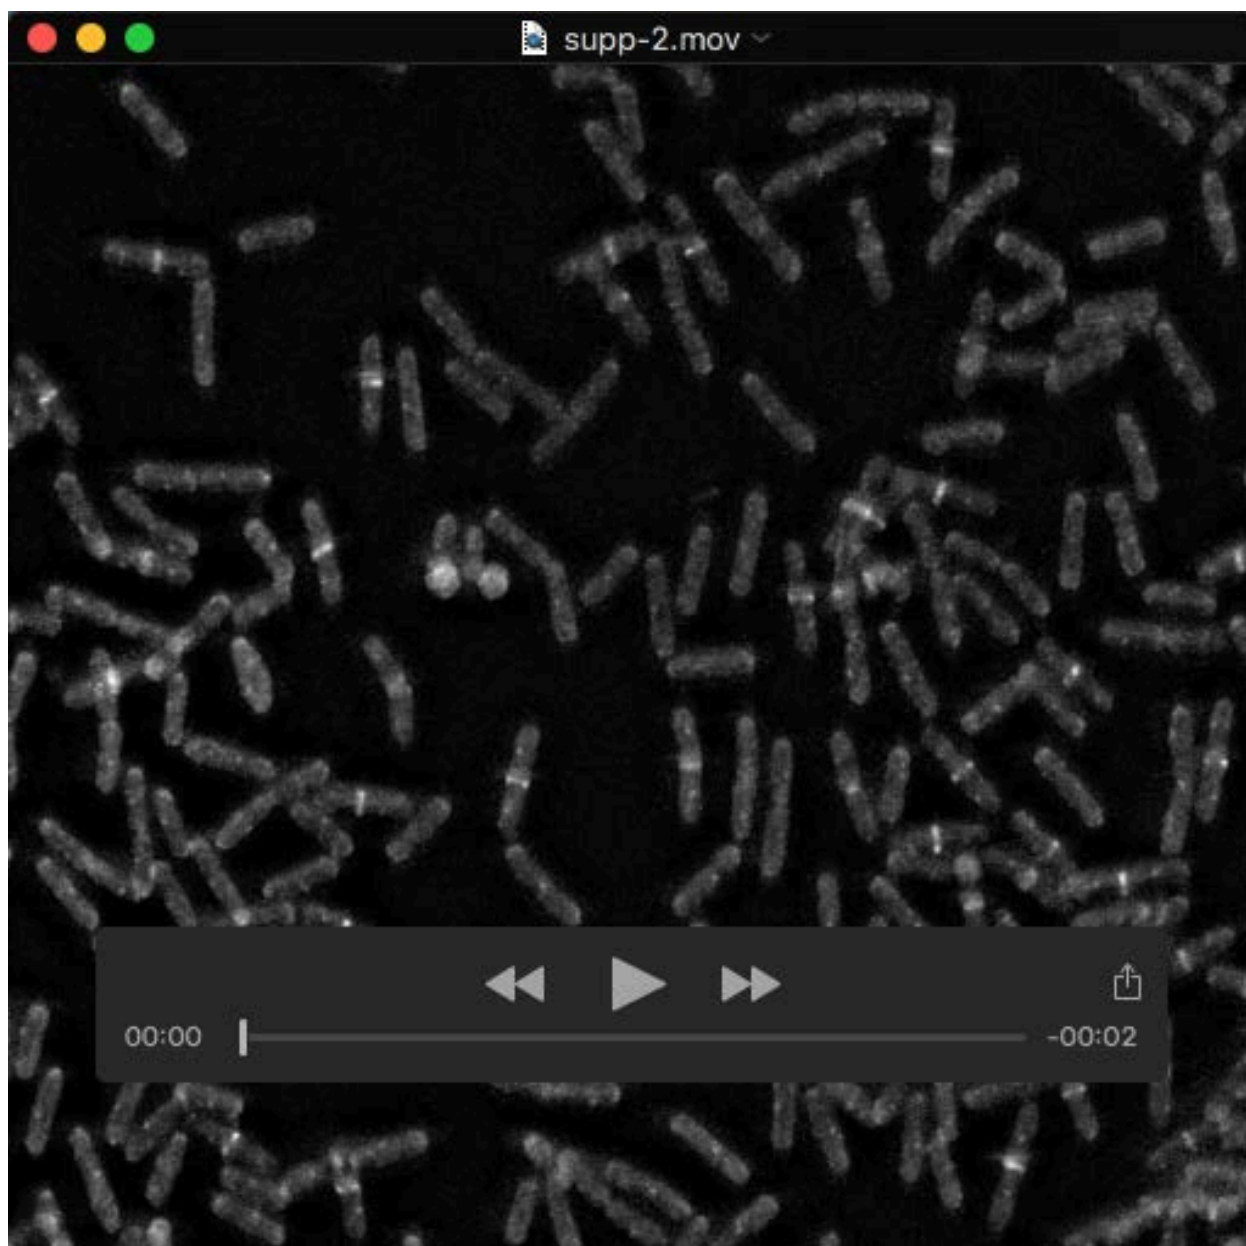

**Movie S1. Cam1-YFP dynamics in *S. pombe* cells cultured in EMMG at 25°C and 1 atmosphere pressure within the pressure chamber.** YFP signal from mid-log phase *cam1.yfp* cells cultured within the pressure imaging chamber. Stage drift was not corrected. Images are maximum projections of 15 x 0.5 $\mu$ m spaced z-slice images, captured every 5 min.

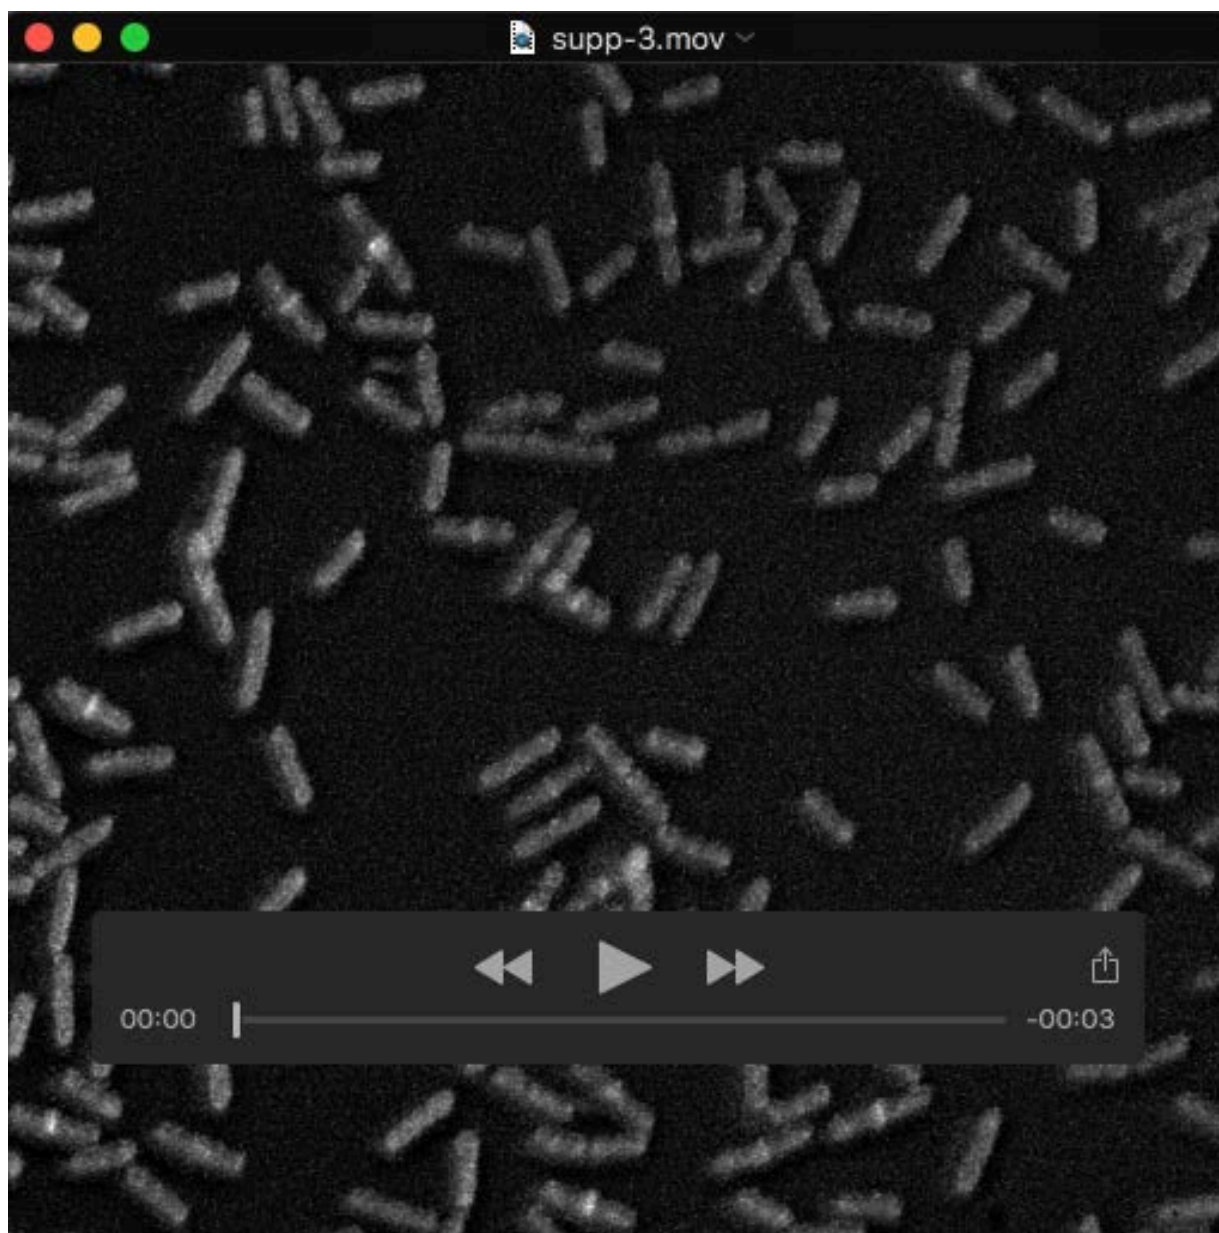

**Movie S2. Cam1-YFP dynamics in *S.pombe* cells cultured in EMMG at 25°C and 100 bar pressure within the pressure chamber.** YFP signal from mid-log phase *cam1.yfp* cells cultured within the pressure imaging chamber. Stage drift was not corrected. Images are maximum projections of 15 x 0.5 $\mu$ m spaced z-slice images, captured every 5 min.
